# Supplementary material for: ortho-Ethynyl group assisted regioselective and diastereoselective [2+2] cross-photocycloaddition of alkenes
Source: Research Square preprint supplement (doi:10.21203/rs.3.rs-523200/v1), 2021-06-01

# checkCIF/PLATON report

Structure factors have been supplied for datablock(s) 1

THIS REPORT IS FOR GUIDANCE ONLY. IF USED AS PART OF A REVIEW PROCEDURE FOR PUBLICATION, IT SHOULD NOT REPLACE THE EXPERTISE OF AN EXPERIENCED CRYSTALLOGRAPHIC REFEREE.

No syntax errors found.      CIF dictionary      Interpreting this report

## Datablock: 1

---

Bond precision:    C-C = 0.0047 Å                      Wavelength=0.71073

Cell:                      a=10.4403(13)              b=21.619(3)              c=25.312(3)  
                            alpha=90                      beta=100.287(3)              gamma=90

Temperature:              296 K

|                | Calculated  | Reported    |
|----------------|-------------|-------------|
| Volume         | 5621.3(12)  | 5621.2(12)  |
| Space group    | P 21/c      | P 21/c      |
| Hall group     | -P 2ybc     | -P 2ybc     |
| Moiety formula | C36 H20 N4  | C36 H20 N4  |
| Sum formula    | C36 H20 N4  | C36 H20 N4  |
| Mr             | 508.56      | 508.56      |
| Dx,g cm-3      | 1.202       | 1.202       |
| Z              | 8           | 8           |
| Mu (mm-1)      | 0.072       | 0.072       |
| F000           | 2112.0      | 2112.0      |
| F000'          | 2112.73     |             |
| h,k,lmax       | 12,25,30    | 12,25,30    |
| Nref           | 10022       | 10008       |
| Tmin,Tmax      | 0.975,0.980 | 0.898,0.908 |
| Tmin'          | 0.975       |             |

Correction method= # Reported T Limits: Tmin=0.898 Tmax=0.908  
AbsCorr = MULTI-SCAN

Data completeness= 0.999                      Theta(max)= 25.099

R(reflections)= 0.0593( 5296)              wR2(reflections)= 0.1756( 10008)

S = 1.004                      Npar= 709

---

The following ALERTS were generated. Each ALERT has the format

**test-name\_ALERT\_alert-type\_alert-level.**

Click on the hyperlinks for more details of the test.

---

## Alert level B

PLAT220\_ALERT\_2\_B Non-Solvent Resd 2 C Ueq(max)/Ueq(min) Range 8.7 Ratio

---

## Alert level C

PLAT018\_ALERT\_1\_C \_diffn\_measured\_fraction\_theta\_max .NE. \*\_full ! Check  
PLAT213\_ALERT\_2\_C Atom C70 has ADP max/min Ratio ..... 3.1 prolat  
PLAT213\_ALERT\_2\_C Atom C71 has ADP max/min Ratio ..... 3.1 prolat  
PLAT213\_ALERT\_2\_C Atom C72 has ADP max/min Ratio ..... 3.1 prolat  
PLAT222\_ALERT\_3\_C Non-Solv. Resd 2 H Uiso(max)/Uiso(min) Range 8.7 Ratio  
PLAT230\_ALERT\_2\_C Hirshfeld Test Diff for C67 --C68 . 5.9 s.u.  
PLAT234\_ALERT\_4\_C Large Hirshfeld Difference C68 --C69 . 0.18 Ang.  
PLAT234\_ALERT\_4\_C Large Hirshfeld Difference C69 --C70 . 0.25 Ang.  
PLAT234\_ALERT\_4\_C Large Hirshfeld Difference C70 --C71 . 0.24 Ang.  
PLAT234\_ALERT\_4\_C Large Hirshfeld Difference C71 --C72 . 0.21 Ang.  
PLAT241\_ALERT\_2\_C High 'MainMol' Ueq as Compared to Neighbors of C62 Check  
PLAT241\_ALERT\_2\_C High 'MainMol' Ueq as Compared to Neighbors of C70 Check  
PLAT241\_ALERT\_2\_C High 'MainMol' Ueq as Compared to Neighbors of C71 Check  
PLAT241\_ALERT\_2\_C High 'MainMol' Ueq as Compared to Neighbors of C72 Check  
PLAT242\_ALERT\_2\_C Low 'MainMol' Ueq as Compared to Neighbors of C67 Check  
PLAT340\_ALERT\_3\_C Low Bond Precision on C-C Bonds ..... 0.0047 Ang.  
PLAT905\_ALERT\_3\_C Negative K value in the Analysis of Variance ... -2.949 Report  
PLAT910\_ALERT\_3\_C Missing # of FCF Reflection(s) Below Theta(Min). 8 Note  
PLAT911\_ALERT\_3\_C Missing FCF Refl Between Thmin & STh/L= 0.597 6 Report

---

## Alert level G

PLAT003\_ALERT\_2\_G Number of Uiso or Uij Restrained non-H Atoms ... 2 Report  
PLAT177\_ALERT\_4\_G The CIF-Embedded .res File Contains DELU Records 1 Report  
PLAT230\_ALERT\_2\_G Hirshfeld Test Diff for C2 --C3 . 6.5 s.u.  
PLAT230\_ALERT\_2\_G Hirshfeld Test Diff for C64 --C65 . 7.0 s.u.  
PLAT343\_ALERT\_2\_G Unusual sp3 Angle Range in Main Residue for C4 Check  
PLAT371\_ALERT\_2\_G Long C(sp2)-C(sp1) Bond C10 - C11 . 1.43 Ang.  
PLAT371\_ALERT\_2\_G Long C(sp2)-C(sp1) Bond C12 - C13 . 1.44 Ang.  
PLAT371\_ALERT\_2\_G Long C(sp2)-C(sp1) Bond C28 - C29 . 1.44 Ang.  
PLAT371\_ALERT\_2\_G Long C(sp2)-C(sp1) Bond C30 - C31 . 1.43 Ang.  
PLAT371\_ALERT\_2\_G Long C(sp2)-C(sp1) Bond C46 - C47 . 1.43 Ang.  
PLAT371\_ALERT\_2\_G Long C(sp2)-C(sp1) Bond C48 - C49 . 1.44 Ang.  
PLAT371\_ALERT\_2\_G Long C(sp2)-C(sp1) Bond C64 - C65 . 1.42 Ang.  
PLAT371\_ALERT\_2\_G Long C(sp2)-C(sp1) Bond C66 - C67 . 1.46 Ang.  
PLAT860\_ALERT\_3\_G Number of Least-Squares Restraints ..... 1 Note  
PLAT883\_ALERT\_1\_G No Info/Value for \_atom\_sites\_solution\_primary . Please Do !  
PLAT933\_ALERT\_2\_G Number of OMIT Records in Embedded .res File ... 6 Note  
PLAT978\_ALERT\_2\_G Number C-C Bonds with Positive Residual Density. 2 Info

---

0 **ALERT level A** = Most likely a serious problem - resolve or explain  
1 **ALERT level B** = A potentially serious problem, consider carefully  
19 **ALERT level C** = Check. Ensure it is not caused by an omission or oversight  
17 **ALERT level G** = General information/check it is not something unexpected

2 ALERT type 1 CIF construction/syntax error, inconsistent or missing data  
24 ALERT type 2 Indicator that the structure model may be wrong or deficient  
6 ALERT type 3 Indicator that the structure quality may be low  
5 ALERT type 4 Improvement, methodology, query or suggestion  
0 ALERT type 5 Informative message, check

---

---

It is advisable to attempt to resolve as many as possible of the alerts in all categories. Often the minor alerts point to easily fixed oversights, errors and omissions in your CIF or refinement strategy, so attention to these fine details can be worthwhile. In order to resolve some of the more serious problems it may be necessary to carry out additional measurements or structure refinements. However, the purpose of your study may justify the reported deviations and the more serious of these should normally be commented upon in the discussion or experimental section of a paper or in the "special\_details" fields of the CIF. checkCIF was carefully designed to identify outliers and unusual parameters, but every test has its limitations and alerts that are not important in a particular case may appear. Conversely, the absence of alerts does not guarantee there are no aspects of the results needing attention. It is up to the individual to critically assess their own results and, if necessary, seek expert advice.

### **Publication of your CIF in IUCr journals**

A basic structural check has been run on your CIF. These basic checks will be run on all CIFs submitted for publication in IUCr journals (*Acta Crystallographica*, *Journal of Applied Crystallography*, *Journal of Synchrotron Radiation*); however, if you intend to submit to *Acta Crystallographica Section C* or *E* or *IUCrData*, you should make sure that full publication checks are run on the final version of your CIF prior to submission.

### **Publication of your CIF in other journals**

Please refer to the *Notes for Authors* of the relevant journal for any special instructions relating to CIF submission.

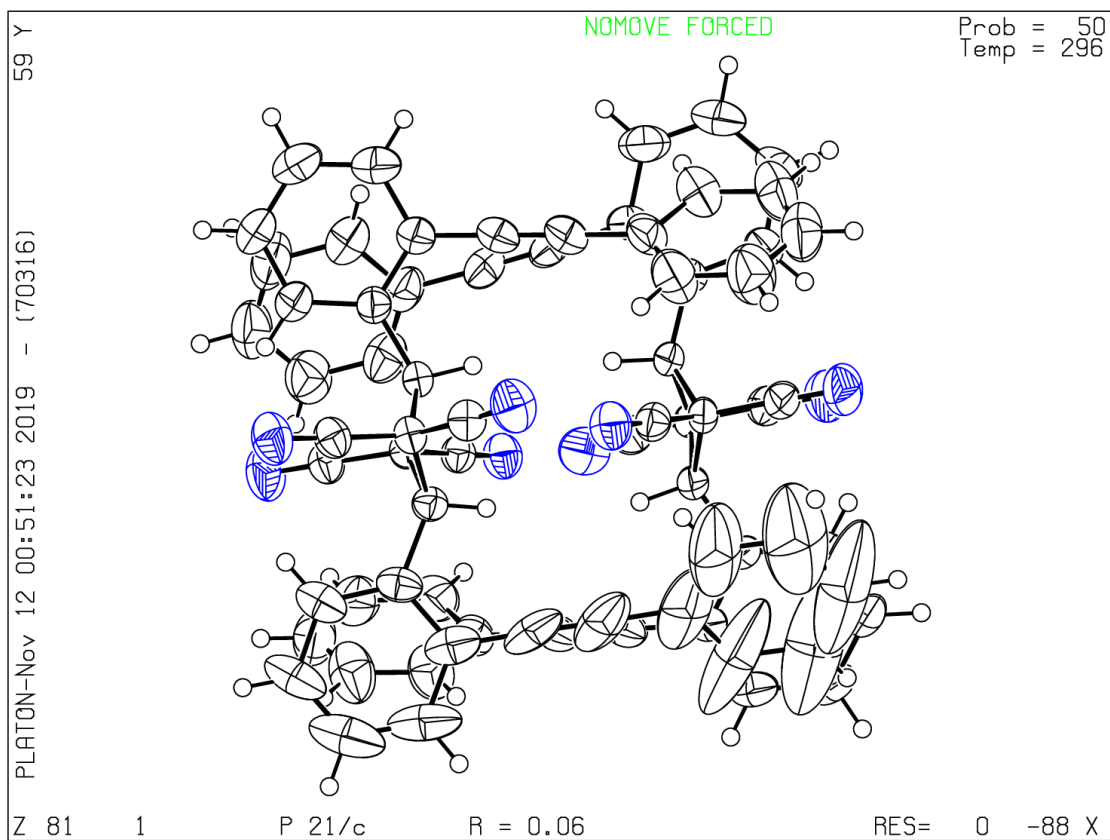

Supplement: Supplementary file 11 [file 8aa-checkcif.pdf › cif/checkcif/8aa-checkcif.pdf]
